# Supplementary material
Source: PubMed Central journal article supplement (PMC5167174)
Supplement: pnas.1614898113.sapp.pdf [file pnas.1614898113.sapp.pdf]

## SI Appendix

# Rapid emergence and mechanisms of resistance by U87 glioblastoma cells to doxorubicin in an in vitro tumor microfluidic ecology

Jeonghun Han<sup>a,1</sup>, Yukyung Jun<sup>b,c,1</sup>, So Hyun Kim<sup>d</sup>, Hong-Hoa Hoang<sup>a</sup>, Yeonjoo Jung<sup>c</sup>,  
Suyeon Kim<sup>b,c</sup>, Jaesang Kim<sup>b,c</sup>, Robert H. Austin<sup>e,2</sup>, Sanghyuk Lee<sup>b,c,2</sup>, Sungsu Park<sup>a,2</sup>

<sup>a</sup>School of Mechanical Engineering, Sungkyunkwan University, Suwon 16419, Korea

<sup>b</sup>Department of Life Science, Ewha Womans University, Seoul 03760, Korea

<sup>c</sup>Ewha Research Center for Systems Biology (ERCBS), Ewha Womans University, Seoul 03760, Korea

<sup>d</sup>Center for BioMicrosystems, Brain Science Institute, Korea Institute of Science and Technology (KIST), Seoul 02792, Korea

<sup>e</sup>Department of Physics, Princeton University, Princeton, NJ 08544

<sup>1</sup>These authors contributed equally to this work.

<sup>2</sup>Corresponding author. Email: nanopark@skku.edu (S.P.); sanghyuk@ewha.ac.kr (S.L.); austin@princeton.edu (R.H.A.)

## Table of Contents

### Supplementary Figures

|                                                                                               |   |
|-----------------------------------------------------------------------------------------------|---|
| Fig. S1. Structure and concentration gradient of the chip .....                               | 3 |
| Fig. S2. Distribution of viable cells in the chip over a period of 7 days .....               | 4 |
| Fig. S3. siRNA knockdown of the <i>FLNA</i> , <i>CARD6</i> and <i>NSD1</i> in U87 cells ..... | 9 |

### Supplementary Tables

|                                                                                              |    |
|----------------------------------------------------------------------------------------------|----|
| Table S1. List of mutations identified in resistant cells .....                              | 10 |
| Table S2. Gene Ontology enrichment analysis for mutated genes .....                          | 16 |
| Table S3. List of differentially expressed genes .....                                       | 20 |
| Table S4. KEGG and Gene Ontology enrichment analysis for differentially expressed genes..... | 23 |

**Fig. S1. Structure and concentration gradient of the chip.** Schematic figures show assembly and operation of a chip (A). Concentration gradient using red and blue ink shows the actual entire (B) and enlarged images (C).

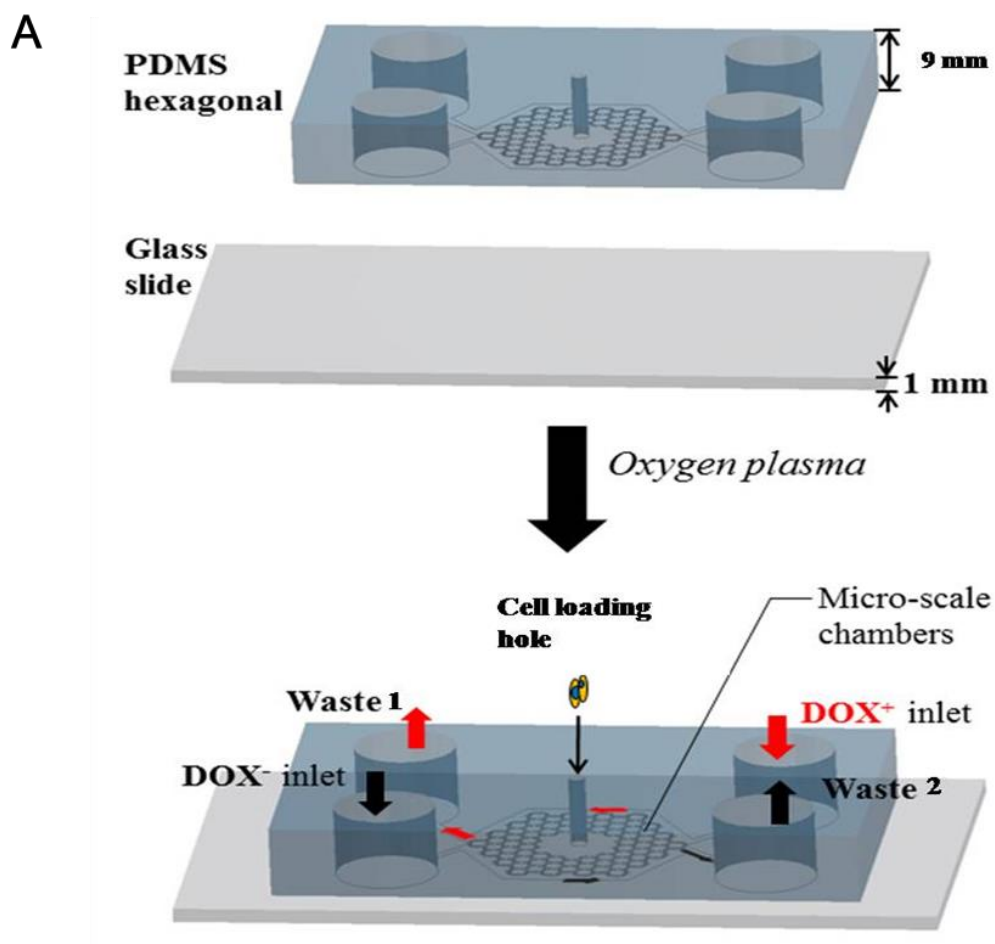

**B**

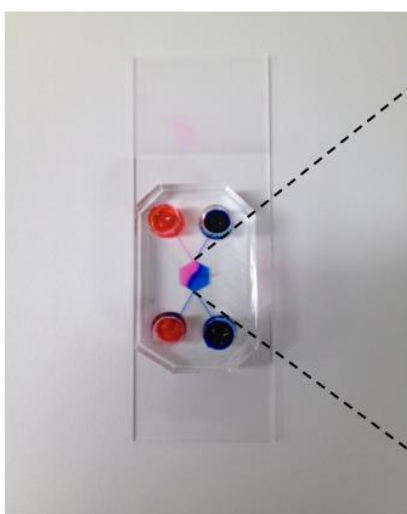

**C**

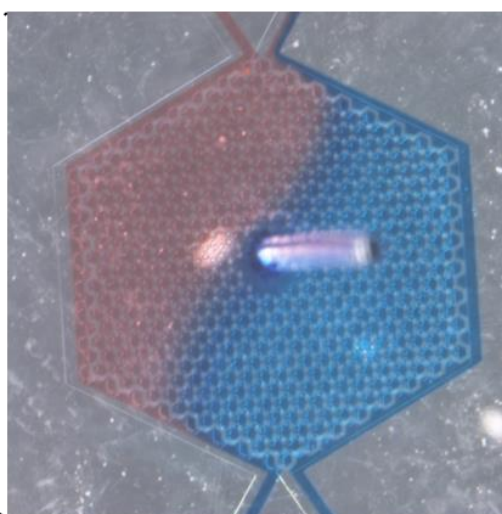

**Fig. S2. Distribution of viable cells in the chip over a period of 7 days.** (A) Enlarged pictures of viable cells. Polarized cells (red arrows) were counted as healthy cells in each chamber. (B-E) Microscope images of DOX-treated U87 cells on the chip on 0, 3, 5, and 7 days. Twenty images covering each part of the chip were stitched manually for each picture. Cells were observed under an inverted microscope (Magnification = 40 ×) (Eclipse TE 2000-U, Nikon) with a CCD camera (Progress C10 plus, Jenoptik AG, Jena, Germany).

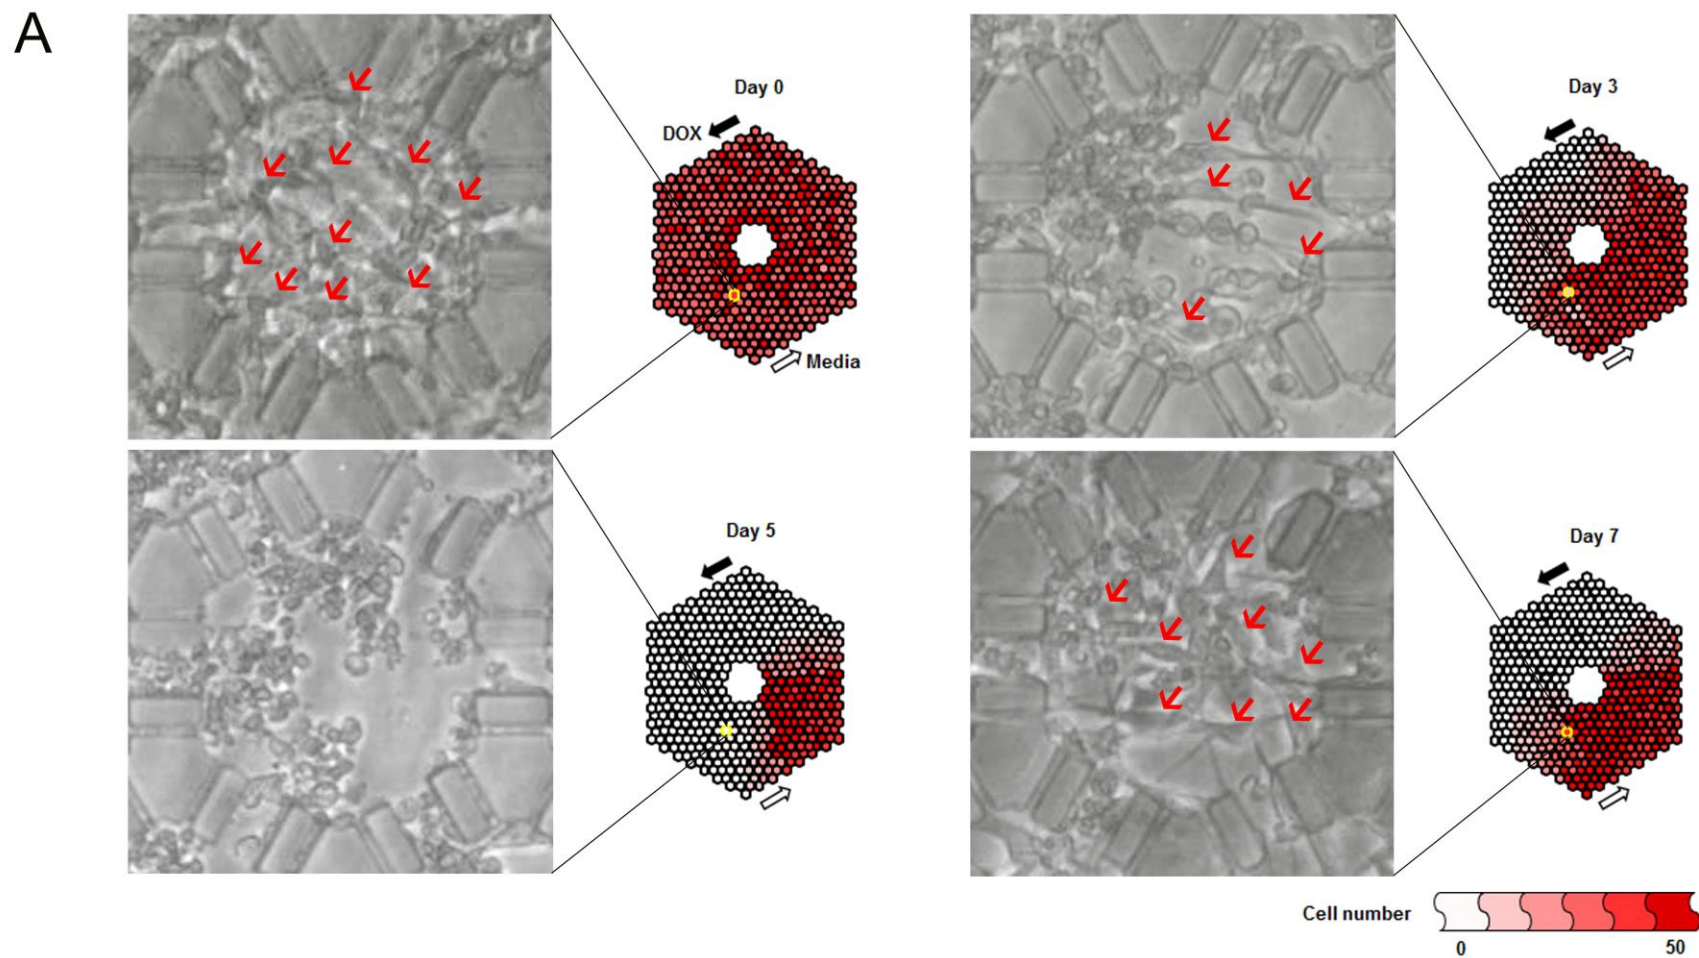

B

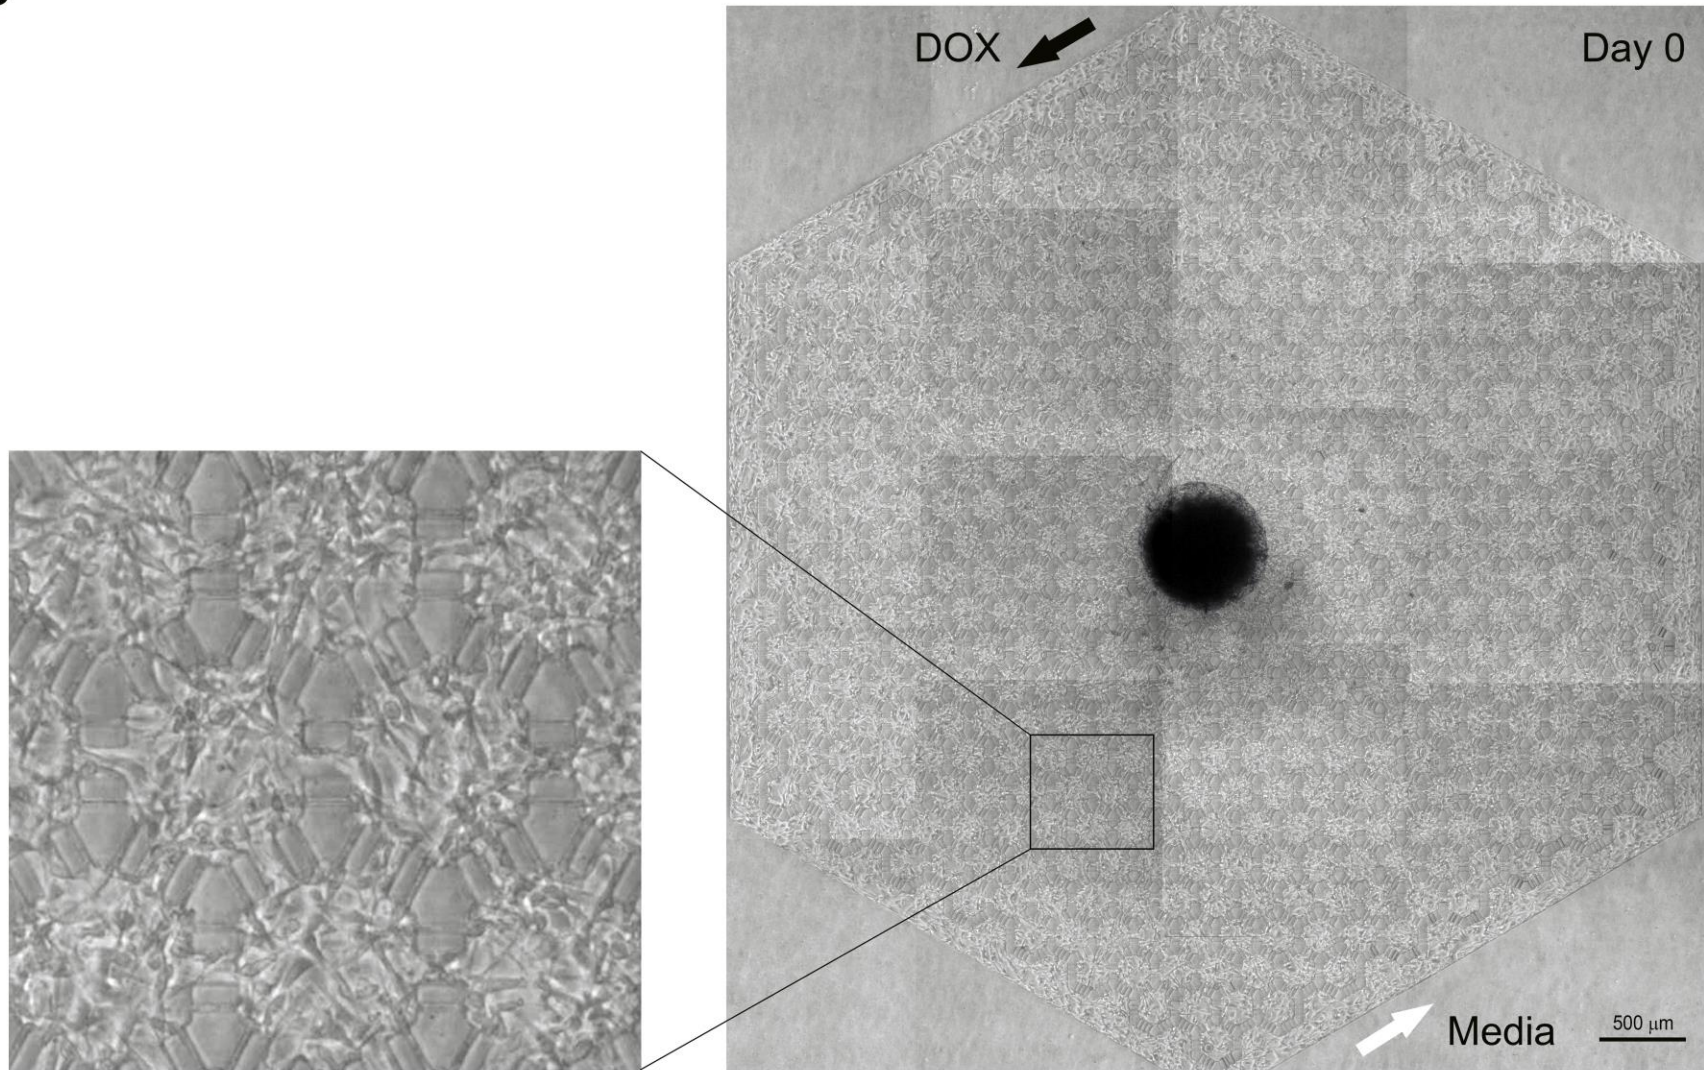

C

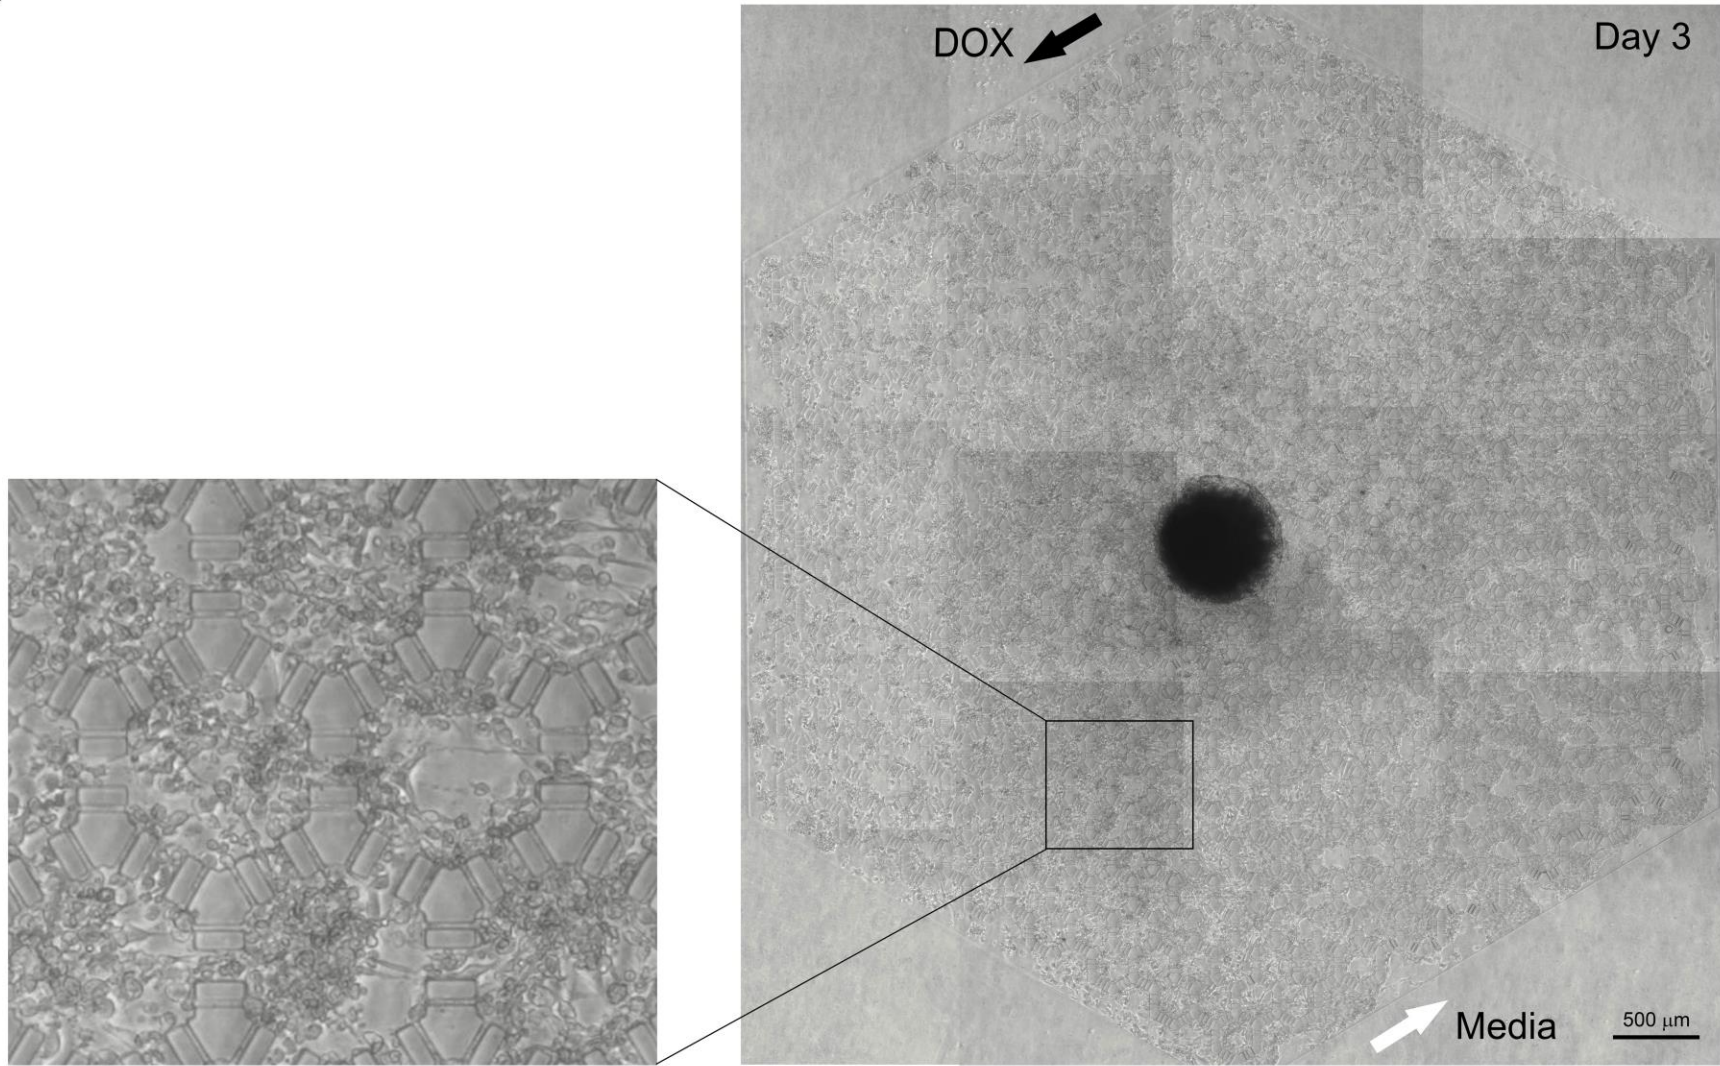

D

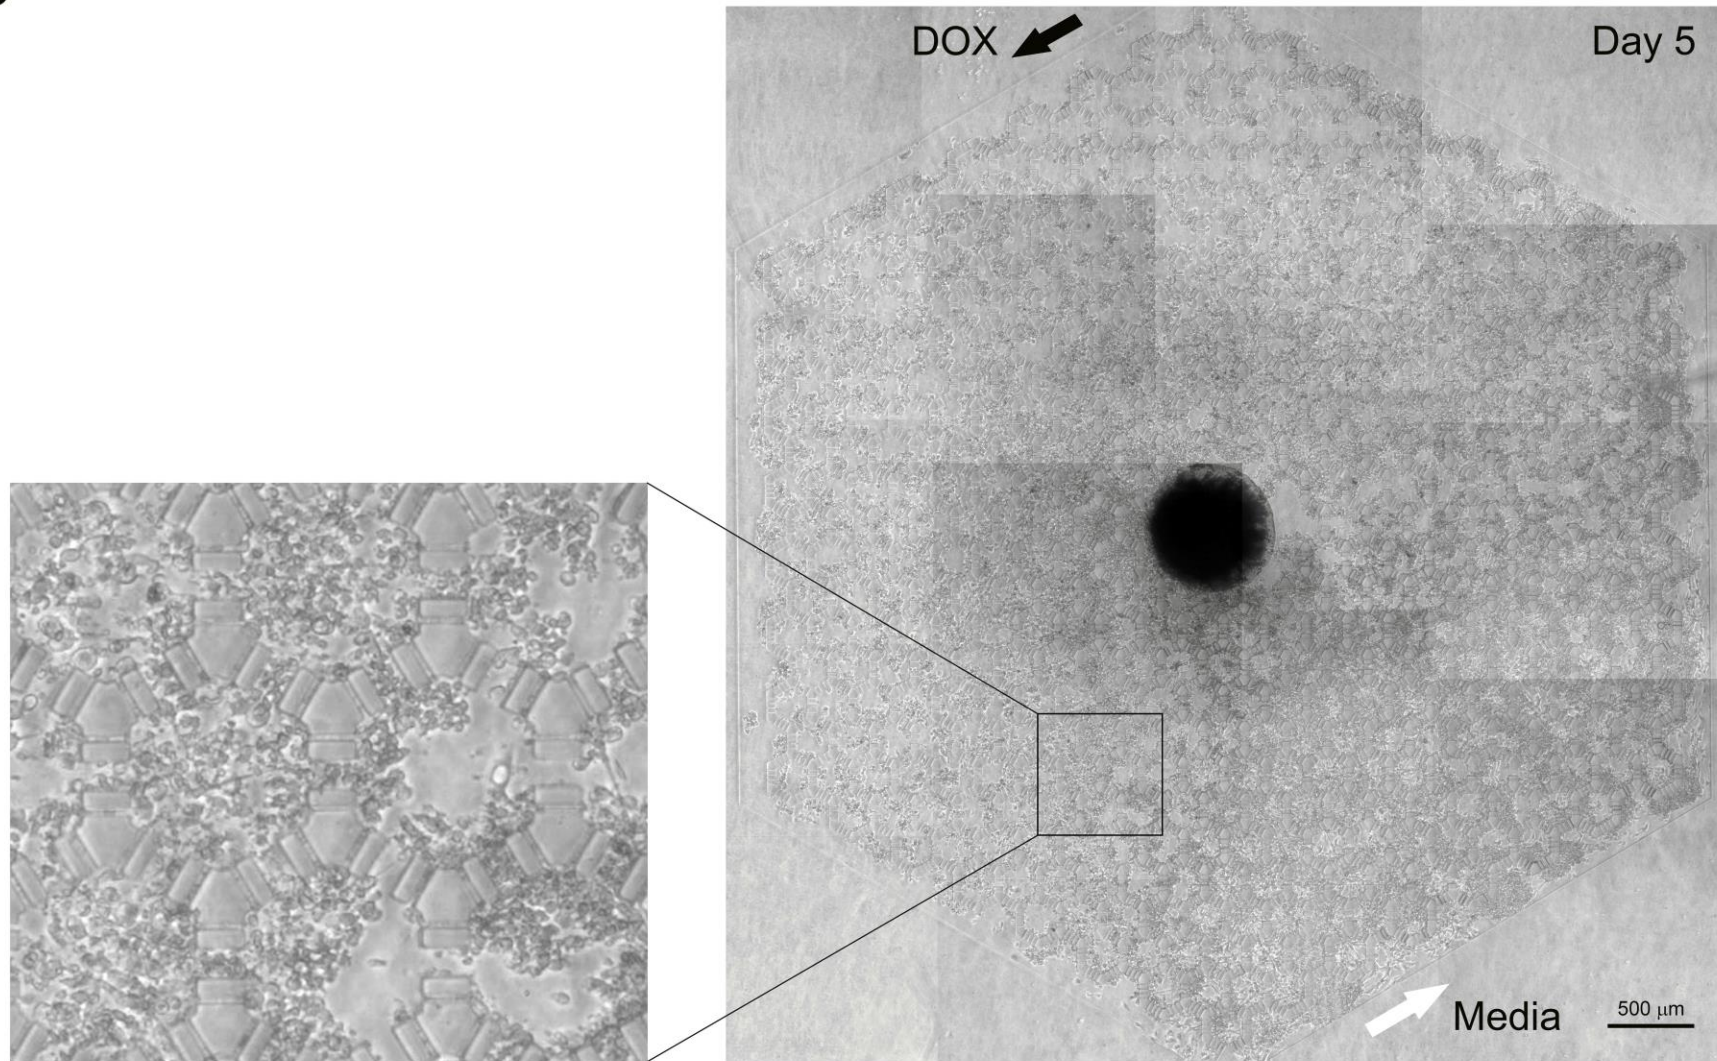

E

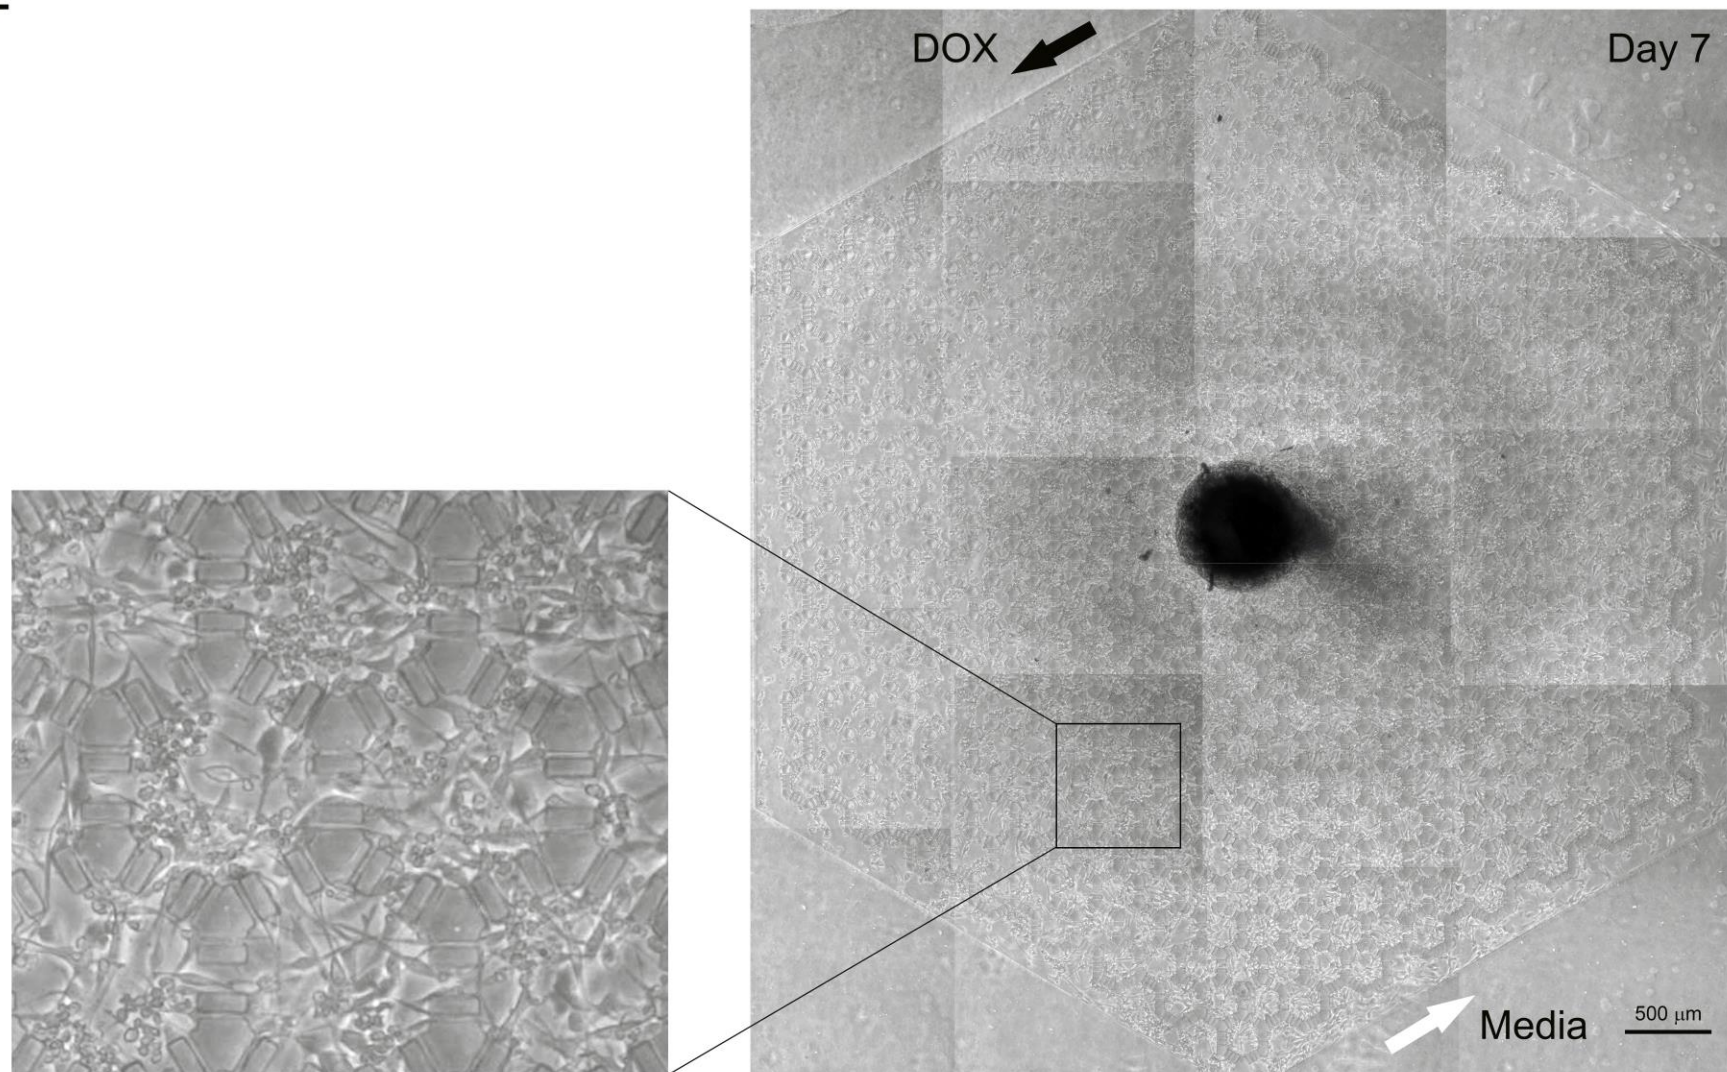



**Fig. S3. siRNA knockdown of the *FLNA*, *CARD6* and *NSD1* in U87 cells.** Relative mRNA levels for *FLNA* (A), *CARD6* (B) and *NSD1* (C) in U87 cells after a 48 hr-treatment with negative control (NC) or specific siRNAs (20 nM). Targeting sequences for the three genes are described in Materials and Methods. Bars indicate relative mRNA levels determined by real-time PCR analysis. \*  $P < 0.05$  with one-tailed  $t$  test.

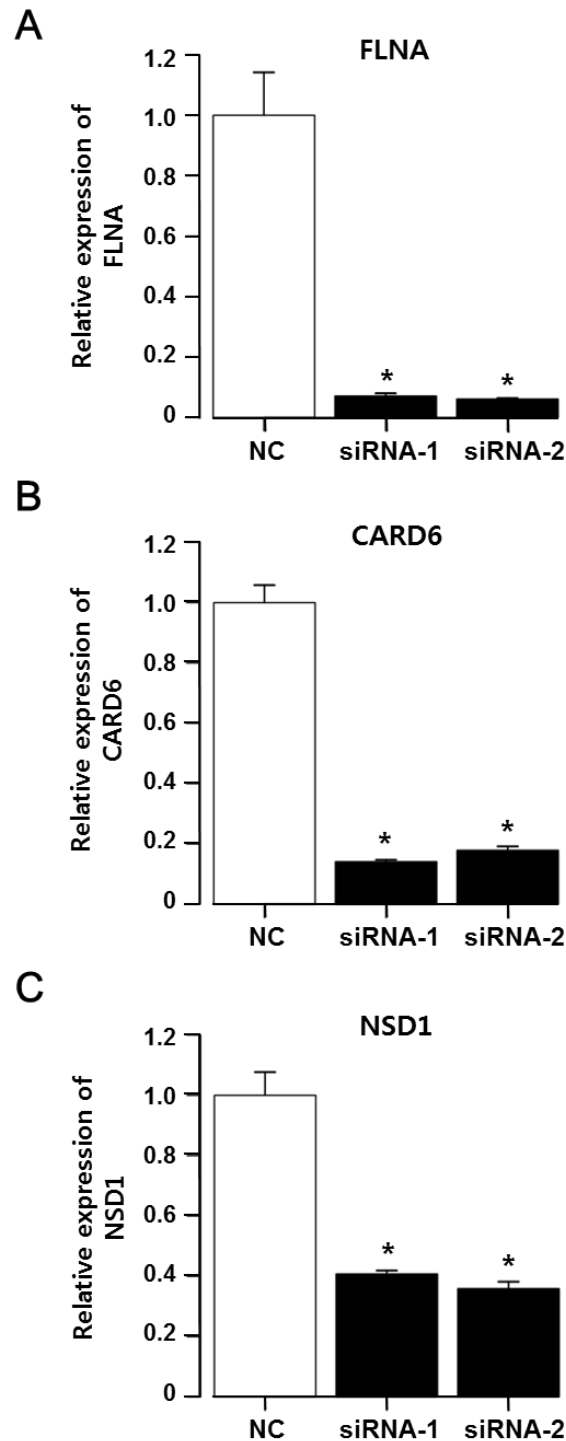

**Table S1. List of mutations identified in resistant cells.**

| Gene name | Variant position | Ref allele | Alt allele     | Variant type               | # Programs | MuTect | Strelka | VarScan2 | Virimid | U87-WT ref allele count | U87-WT alt allele count | U87-DR ref allele count | U87-DR alt allele count | U87-WT variant frequency | U87-DR variant frequency |
|-----------|------------------|------------|----------------|----------------------------|------------|--------|---------|----------|---------|-------------------------|-------------------------|-------------------------|-------------------------|--------------------------|--------------------------|
| FLNA      | chrX:153580779   | C          | CT             | frameshift substitution    | 2          | -      | O       | O        | -       | 124                     | 1                       | 79                      | 46                      | 0.01                     | 0.37                     |
| CCDC33    | chr15:74573138   | T          | TCATG<br>GTGAG | nonframeshift substitution | 2          | -      | O       | O        | -       | 26                      | 0                       | 22                      | 13                      | 0.00                     | 0.37                     |
| CARD6     | chr5:40853448    | G          | T              | stopgain SNV               | 4          | O      | O       | O        | O       | 144                     | 0                       | 102                     | 35                      | 0.00                     | 0.26                     |
| GOT1L1    | chr8:37795200    | C          | T              | stopgain SNV               | 4          | O      | O       | O        | O       | 105                     | 0                       | 83                      | 23                      | 0.00                     | 0.22                     |
| LINGO1    | chr15:77908136   | G          | T              | stopgain SNV               | 3          | O      | O       | X        | O       | 58                      | 0                       | 42                      | 10                      | 0.00                     | 0.19                     |
| C8orf34   | chr8:69445270    | A          | T              | stopgain SNV               | 3          | O      | O       | X        | O       | 79                      | 0                       | 73                      | 12                      | 0.00                     | 0.14                     |
| ZNF850    | chr19:37241539   | C          | A              | stopgain SNV               | 3          | O      | O       | X        | O       | 166                     | 0                       | 148                     | 25                      | 0.00                     | 0.14                     |
| ARSF      | chrX:3019199     | G          | A              | nonsynonymous SNV          | 4          | O      | O       | O        | O       | 29                      | 0                       | 11                      | 20                      | 0.00                     | 0.65                     |
| DHX33     | chr17:5364351    | C          | T              | nonsynonymous SNV          | 4          | O      | O       | O        | O       | 24                      | 0                       | 24                      | 23                      | 0.00                     | 0.49                     |
| NSD1      | chr5:176638780   | T          | G              | nonsynonymous SNV          | 4          | O      | O       | O        | O       | 80                      | 1                       | 70                      | 37                      | 0.01                     | 0.35                     |
| LIPG      | chr18:47101781   | A          | G              | nonsynonymous SNV          | 4          | O      | O       | O        | O       | 63                      | 0                       | 28                      | 13                      | 0.00                     | 0.32                     |
| SKOR2     | chr18:44771284   | C          | G              | nonsynonymous SNV          | 4          | O      | O       | O        | O       | 188                     | 0                       | 91                      | 42                      | 0.00                     | 0.32                     |
| CHD1      | chr5:98238646    | G          | A              | nonsynonymous SNV          | 4          | O      | O       | O        | O       | 53                      | 0                       | 31                      | 14                      | 0.00                     | 0.31                     |
| ERMARD    | chr6:170179366   | G          | A              | nonsynonymous SNV          | 4          | O      | O       | O        | O       | 57                      | 0                       | 60                      | 25                      | 0.00                     | 0.29                     |
| RABGAP1   | chr9:125852567   | G          | A              | nonsynonymous SNV          | 4          | O      | O       | O        | O       | 192                     | 0                       | 119                     | 48                      | 0.00                     | 0.29                     |
| SSH2      | chr17:28022500   | G          | A              | nonsynonymous SNV          | 4          | O      | O       | O        | O       | 156                     | 0                       | 139                     | 58                      | 0.00                     | 0.29                     |
| ZXDC      | chr3:126160744   | C          | G              | nonsynonymous SNV          | 4          | O      | O       | O        | O       | 51                      | 1                       | 43                      | 16                      | 0.02                     | 0.27                     |
| NLRP13    | chr19:56424116   | A          | T              | nonsynonymous SNV          | 4          | O      | O       | O        | O       | 138                     | 0                       | 108                     | 39                      | 0.00                     | 0.27                     |

|         |                |   |   |                      |   |   |   |   |   |     |   |     |    |      |      |
|---------|----------------|---|---|----------------------|---|---|---|---|---|-----|---|-----|----|------|------|
| TEP1    | chr14:20852650 | C | T | nonsynonymous<br>SNV | 4 | O | O | O | O | 136 | 0 | 139 | 48 | 0.00 | 0.26 |
| TAAR8   | chr6:132874459 | C | T | nonsynonymous<br>SNV | 4 | O | O | O | O | 137 | 0 | 108 | 33 | 0.00 | 0.23 |
| SLC16A9 | chr10:61432626 | A | T | nonsynonymous<br>SNV | 4 | O | O | O | O | 75  | 0 | 65  | 21 | 0.00 | 0.24 |
| G3BP1   | chr5:151179487 | C | A | nonsynonymous<br>SNV | 4 | O | O | O | O | 50  | 0 | 44  | 13 | 0.00 | 0.23 |
| NME9    | chr3:138037054 | G | T | nonsynonymous<br>SNV | 4 | O | O | O | O | 152 | 1 | 126 | 37 | 0.01 | 0.23 |
| GAS8    | chr16:90109746 | C | T | nonsynonymous<br>SNV | 4 | O | O | O | O | 87  | 1 | 69  | 20 | 0.01 | 0.22 |
| APOB    | chr2:21228513  | C | A | nonsynonymous<br>SNV | 4 | O | O | O | O | 184 | 0 | 137 | 39 | 0.00 | 0.22 |
| KLHL6   | chr3:183217557 | A | C | nonsynonymous<br>SNV | 4 | O | O | O | O | 105 | 0 | 62  | 17 | 0.00 | 0.22 |
| RPS6KA2 | chr6:166844082 | C | G | nonsynonymous<br>SNV | 4 | O | O | O | O | 138 | 0 | 112 | 29 | 0.00 | 0.21 |
| ZNF570  | chr19:37975635 | G | T | nonsynonymous<br>SNV | 4 | O | O | O | O | 125 | 1 | 118 | 31 | 0.01 | 0.21 |
| C8orf34 | chr8:69552737  | G | A | nonsynonymous<br>SNV | 4 | O | O | O | O | 51  | 0 | 44  | 11 | 0.00 | 0.20 |
| ZNF41   | chrX:47306866  | A | G | nonsynonymous<br>SNV | 3 | X | O | O | O | 114 | 3 | 44  | 61 | 0.03 | 0.58 |
| APOOL   | chrX:84342596  | G | T | nonsynonymous<br>SNV | 3 | X | O | O | O | 51  | 2 | 28  | 32 | 0.04 | 0.53 |
| FMN1    | chr15:33261185 | G | A | nonsynonymous<br>SNV | 3 | X | O | O | O | 15  | 0 | 13  | 6  | 0.00 | 0.32 |
| ADORA1  | chr1:203134621 | C | G | nonsynonymous<br>SNV | 3 | X | O | O | O | 318 | 2 | 282 | 95 | 0.01 | 0.25 |
| FREM2   | chr13:39425959 | G | T | nonsynonymous<br>SNV | 3 | O | O | X | O | 101 | 0 | 82  | 21 | 0.00 | 0.20 |
| FRMPD2  | chr10:49440275 | C | T | nonsynonymous<br>SNV | 3 | O | O | O | X | 41  | 1 | 39  | 10 | 0.02 | 0.20 |
| SLC22A5 | chr5:131724658 | G | C | nonsynonymous<br>SNV | 3 | O | O | O | X | 57  | 1 | 54  | 14 | 0.02 | 0.21 |
| LILRB1  | chr19:55144739 | C | T | nonsynonymous<br>SNV | 3 | O | O | X | O | 42  | 0 | 25  | 6  | 0.00 | 0.19 |
| ERVV-1  | chr19:53518647 | A | G | nonsynonymous<br>SNV | 3 | O | O | X | O | 228 | 0 | 200 | 50 | 0.00 | 0.20 |
| DLEC1   | chr3:38163847  | C | T | nonsynonymous<br>SNV | 3 | O | O | X | O | 112 | 1 | 82  | 19 | 0.01 | 0.19 |

|          |                |   |   |                      |   |   |   |   |   |     |   |     |    |      |      |
|----------|----------------|---|---|----------------------|---|---|---|---|---|-----|---|-----|----|------|------|
| TRMT1    | chr19:13220389 | C | G | nonsynonymous<br>SNV | 3 | O | O | X | O | 49  | 0 | 35  | 8  | 0.00 | 0.19 |
| APOB     | chr2:21231675  | G | A | nonsynonymous<br>SNV | 3 | O | O | X | O | 99  | 0 | 94  | 21 | 0.00 | 0.18 |
| RREB1    | chr6:7231881   | G | C | nonsynonymous<br>SNV | 3 | O | O | X | O | 21  | 0 | 31  | 6  | 0.00 | 0.16 |
| C10orf71 | chr10:50532588 | C | G | nonsynonymous<br>SNV | 3 | O | O | X | O | 54  | 0 | 48  | 10 | 0.00 | 0.17 |
| SLC10A7  | chr4:147425023 | G | A | nonsynonymous<br>SNV | 3 | O | O | X | O | 101 | 0 | 102 | 19 | 0.00 | 0.16 |
| ZFAND4   | chr10:46111895 | G | A | nonsynonymous<br>SNV | 3 | O | O | X | O | 269 | 0 | 251 | 48 | 0.00 | 0.16 |
| ARHGAP22 | chr10:49658842 | C | G | nonsynonymous<br>SNV | 3 | O | O | X | O | 30  | 0 | 40  | 7  | 0.00 | 0.15 |
| CLK4     | chr5:178040567 | T | C | nonsynonymous<br>SNV | 3 | O | O | X | O | 27  | 0 | 30  | 5  | 0.00 | 0.14 |
| C10orf71 | chr10:50531137 | A | T | nonsynonymous<br>SNV | 3 | O | O | X | O | 94  | 1 | 116 | 19 | 0.01 | 0.14 |
| FRMPD2   | chr10:49420008 | T | C | nonsynonymous<br>SNV | 3 | O | O | X | O | 43  | 0 | 44  | 7  | 0.00 | 0.14 |
| CHIT1    | chr1:203192351 | A | G | nonsynonymous<br>SNV | 3 | O | O | X | O | 44  | 0 | 36  | 6  | 0.00 | 0.14 |
| URI1     | chr19:30505869 | G | A | nonsynonymous<br>SNV | 3 | O | O | X | O | 147 | 0 | 118 | 14 | 0.00 | 0.11 |
| COQ9     | chr16:57486804 | C | T | nonsynonymous<br>SNV | 3 | O | O | X | O | 22  | 0 | 28  | 3  | 0.00 | 0.10 |
| GPRIN2   | chr10:46999577 | G | T | nonsynonymous<br>SNV | 3 | O | O | X | O | 102 | 0 | 149 | 18 | 0.00 | 0.11 |
| MLLT4    | chr6:168348550 | G | A | nonsynonymous<br>SNV | 3 | O | O | X | O | 76  | 0 | 59  | 6  | 0.00 | 0.09 |
| CCL21    | chr9:34709668  | C | T | nonsynonymous<br>SNV | 3 | O | O | X | O | 76  | 0 | 65  | 6  | 0.00 | 0.08 |
| NIN      | chr14:51224525 | C | T | nonsynonymous<br>SNV | 3 | O | O | X | O | 253 | 0 | 247 | 19 | 0.00 | 0.07 |
| SCYL1    | chr11:65298230 | G | A | nonsynonymous<br>SNV | 3 | O | O | X | O | 83  | 0 | 62  | 5  | 0.00 | 0.07 |
| C3orf58  | chr3:143704664 | G | A | nonsynonymous<br>SNV | 3 | O | O | X | O | 124 | 0 | 144 | 10 | 0.00 | 0.06 |
| LAMA1    | chr18:6997823  | A | G | nonsynonymous<br>SNV | 2 | X | O | X | O | 13  | 0 | 16  | 4  | 0.00 | 0.20 |
| SUSD5    | chr3:33195250  | G | A | nonsynonymous<br>SNV | 2 | X | O | X | O | 200 | 2 | 197 | 46 | 0.01 | 0.19 |

|          |                |   |   |                      |   |   |   |   |   |     |   |     |    |      |      |
|----------|----------------|---|---|----------------------|---|---|---|---|---|-----|---|-----|----|------|------|
| IGSF21   | chr1:18661463  | A | T | nonsynonymous<br>SNV | 2 | X | O | X | O | 160 | 2 | 161 | 38 | 0.01 | 0.19 |
| GPRIN2   | chr10:46999596 | G | A | nonsynonymous<br>SNV | 2 | X | O | O | X | 70  | 0 | 88  | 16 | 0.00 | 0.15 |
| C10orf71 | chr10:50532812 | A | G | nonsynonymous<br>SNV | 2 | O | O | X | X | 195 | 1 | 221 | 38 | 0.01 | 0.15 |
| C10orf71 | chr10:50533463 | T | A | nonsynonymous<br>SNV | 2 | O | O | X | X | 51  | 1 | 55  | 6  | 0.02 | 0.10 |
| GPRIN2   | chr10:46999484 | G | T | nonsynonymous<br>SNV | 2 | O | O | X | X | 63  | 1 | 94  | 10 | 0.02 | 0.10 |
| C10orf71 | chr10:50534350 | G | A | nonsynonymous<br>SNV | 2 | O | O | X | X | 28  | 0 | 46  | 5  | 0.00 | 0.10 |
| C10orf71 | chr10:50533841 | G | C | nonsynonymous<br>SNV | 2 | X | O | X | O | 64  | 0 | 83  | 7  | 0.00 | 0.08 |
| GPRIN2   | chr10:46999863 | C | G | nonsynonymous<br>SNV | 2 | O | O | X | X | 102 | 1 | 130 | 9  | 0.01 | 0.06 |
| SERINC4  | chr15:44087290 | A | T | nonsynonymous<br>SNV | 2 | O | O | X | X | 63  | 0 | 52  | 4  | 0.00 | 0.07 |
| OR2T6    | chr1:248551225 | G | T | nonsynonymous<br>SNV | 2 | O | O | X | X | 199 | 0 | 222 | 14 | 0.00 | 0.06 |
| PDZRN4   | chr12:41966862 | C | T | nonsynonymous<br>SNV | 2 | O | O | X | X | 108 | 0 | 102 | 7  | 0.00 | 0.06 |
| ITGAE    | chr17:3660365  | C | T | nonsynonymous<br>SNV | 2 | O | O | X | X | 136 | 1 | 162 | 7  | 0.01 | 0.04 |
| ARMCX3   | chrX:100880326 | C | T | synonymous<br>SNV    | 4 | O | O | O | O | 52  | 0 | 37  | 24 | 0.00 | 0.39 |
| MYH13    | chr17:10212617 | C | T | synonymous<br>SNV    | 4 | O | O | O | O | 24  | 0 | 23  | 12 | 0.00 | 0.34 |
| ASB18    | chr2:237103611 | C | G | synonymous<br>SNV    | 4 | O | O | O | O | 84  | 0 | 57  | 25 | 0.00 | 0.30 |
| KIF13B   | chr8:28928096  | G | A | synonymous<br>SNV    | 4 | O | O | O | O | 76  | 0 | 46  | 19 | 0.00 | 0.29 |
| SAMD14   | chr17:48195018 | C | T | synonymous<br>SNV    | 4 | O | O | O | O | 27  | 0 | 13  | 5  | 0.00 | 0.28 |
| EHBP1    | chr2:63272563  | G | A | synonymous<br>SNV    | 4 | O | O | O | O | 145 | 0 | 110 | 41 | 0.00 | 0.27 |
| KLHDC7A  | chr1:18808805  | A | C | synonymous<br>SNV    | 4 | O | O | O | O | 107 | 0 | 71  | 26 | 0.00 | 0.27 |
| FAM84A   | chr2:14774538  | C | T | synonymous<br>SNV    | 4 | O | O | O | O | 31  | 0 | 18  | 6  | 0.00 | 0.25 |
| KLF7     | chr2:207988993 | G | A | synonymous<br>SNV    | 4 | O | O | O | O | 116 | 1 | 104 | 32 | 0.01 | 0.24 |

|          |                |   |   |                   |   |   |   |   |   |     |   |     |    |      |      |
|----------|----------------|---|---|-------------------|---|---|---|---|---|-----|---|-----|----|------|------|
| FBLN2    | chr3:13611975  | G | A | synonymous<br>SNV | 4 | O | O | O | O | 35  | 0 | 16  | 5  | 0.00 | 0.24 |
| WNT3A    | chr1:228246737 | C | G | synonymous<br>SNV | 4 | O | O | O | O | 90  | 0 | 63  | 17 | 0.00 | 0.21 |
| DCAF10   | chr9:37861377  | C | T | synonymous<br>SNV | 4 | O | O | O | O | 111 | 0 | 91  | 25 | 0.00 | 0.22 |
| PIGL     | chr17:16137346 | G | A | synonymous<br>SNV | 4 | O | O | O | O | 48  | 0 | 33  | 9  | 0.00 | 0.21 |
| RXFP4    | chr1:155912253 | G | T | synonymous<br>SNV | 4 | O | O | O | O | 96  | 0 | 59  | 16 | 0.00 | 0.21 |
| CLDN18   | chr3:137742517 | C | A | synonymous<br>SNV | 4 | O | O | O | O | 38  | 0 | 32  | 8  | 0.00 | 0.20 |
| BAI2     | chr1:32207763  | G | A | synonymous<br>SNV | 3 | O | O | O | X | 29  | 0 | 9   | 3  | 0.00 | 0.25 |
| PHF13    | chr1:6681583   | C | T | synonymous<br>SNV | 3 | O | O | X | O | 186 | 0 | 130 | 28 | 0.00 | 0.18 |
| SLC25A27 | chr6:46637908  | A | C | synonymous<br>SNV | 3 | O | O | X | O | 71  | 0 | 69  | 14 | 0.00 | 0.17 |
| PANK4    | chr1:2451376   | C | T | synonymous<br>SNV | 3 | O | O | X | O | 40  | 0 | 25  | 5  | 0.00 | 0.17 |
| SREBF2   | chr22:42269831 | G | A | synonymous<br>SNV | 3 | O | O | X | O | 52  | 0 | 39  | 8  | 0.00 | 0.17 |
| CXCL12   | chr10:44873197 | T | C | synonymous<br>SNV | 3 | O | O | X | O | 42  | 0 | 37  | 7  | 0.00 | 0.16 |
| ZGPAT    | chr20:62364958 | C | T | synonymous<br>SNV | 3 | O | O | X | O | 179 | 1 | 155 | 32 | 0.01 | 0.17 |
| FRMPD2   | chr10:49420066 | A | G | synonymous<br>SNV | 3 | O | O | X | O | 62  | 0 | 65  | 13 | 0.00 | 0.17 |
| ESPL1    | chr12:53666593 | C | T | synonymous<br>SNV | 3 | O | O | X | O | 53  | 0 | 56  | 11 | 0.00 | 0.16 |
| SYCP2    | chr20:58457012 | G | T | synonymous<br>SNV | 3 | O | O | X | O | 62  | 0 | 52  | 9  | 0.00 | 0.15 |
| C10orf10 | chr10:45473317 | C | T | synonymous<br>SNV | 3 | O | O | X | O | 118 | 0 | 118 | 23 | 0.00 | 0.16 |
| CAGE1    | chr6:7378979   | A | C | synonymous<br>SNV | 3 | O | O | X | O | 26  | 0 | 52  | 9  | 0.00 | 0.15 |
| ATP6V1B2 | chr8:20075750  | C | T | synonymous<br>SNV | 3 | O | O | X | O | 83  | 0 | 55  | 9  | 0.00 | 0.14 |
| TRIP10   | chr19:6749948  | A | G | synonymous<br>SNV | 3 | O | O | X | O | 87  | 0 | 70  | 10 | 0.00 | 0.13 |
| GALR2    | chr17:74073314 | G | A | synonymous<br>SNV | 3 | O | O | X | O | 106 | 0 | 82  | 12 | 0.00 | 0.13 |

|          |                 |   |   |                   |   |   |   |   |   |     |   |     |    |      |      |
|----------|-----------------|---|---|-------------------|---|---|---|---|---|-----|---|-----|----|------|------|
| ZNF543   | chr19:57835121  | G | A | synonymous<br>SNV | 3 | O | O | X | O | 142 | 1 | 117 | 15 | 0.01 | 0.11 |
| ANKRD30A | chr10:37508234  | C | T | synonymous<br>SNV | 3 | O | O | X | O | 137 | 0 | 124 | 17 | 0.00 | 0.12 |
| GPRIN2   | chr10:46999732  | G | A | synonymous<br>SNV | 3 | O | O | X | O | 177 | 0 | 215 | 29 | 0.00 | 0.12 |
| SDSL     | chr12:113875794 | C | T | synonymous<br>SNV | 3 | O | O | X | O | 89  | 0 | 48  | 6  | 0.00 | 0.11 |
| FRA10AC1 | chr10:95452426  | C | T | synonymous<br>SNV | 3 | O | O | X | O | 129 | 0 | 98  | 13 | 0.00 | 0.12 |
| DCAF6    | chr1:168034905  | G | A | synonymous<br>SNV | 3 | O | O | X | O | 18  | 0 | 30  | 3  | 0.00 | 0.09 |
| VPS8     | chr3:184689525  | C | T | synonymous<br>SNV | 3 | O | O | X | O | 160 | 0 | 145 | 12 | 0.00 | 0.08 |
| UACA     | chr15:70961088  | C | T | synonymous<br>SNV | 3 | O | O | X | O | 108 | 0 | 92  | 6  | 0.00 | 0.06 |
| LRRN1    | chr3:3887876    | T | C | synonymous<br>SNV | 2 | X | O | O | X | 92  | 4 | 107 | 71 | 0.04 | 0.40 |
| GPRIN2   | chr10:47000071  | G | A | synonymous<br>SNV | 2 | X | O | X | O | 12  | 0 | 16  | 5  | 0.00 | 0.24 |
| TUBGCP4  | chr15:43692294  | C | T | synonymous<br>SNV | 2 | X | O | O | X | 178 | 4 | 133 | 34 | 0.02 | 0.20 |
| C10orf71 | chr10:50533617  | T | C | synonymous<br>SNV | 2 | O | O | X | X | 134 | 1 | 143 | 19 | 0.01 | 0.12 |
| ZNF594   | chr17:5085959   | G | A | synonymous<br>SNV | 2 | O | O | X | X | 74  | 1 | 62  | 7  | 0.01 | 0.10 |
| MUC6     | chr11:1017056   | A | G | synonymous<br>SNV | 2 | X | O | X | O | 212 | 1 | 254 | 32 | 0.00 | 0.11 |
| FAM13C   | chr10:61043136  | C | A | synonymous<br>SNV | 2 | X | O | X | O | 39  | 0 | 44  | 4  | 0.00 | 0.08 |
| DSP      | chr6:7584260    | G | A | synonymous<br>SNV | 2 | O | O | X | X | 84  | 0 | 134 | 8  | 0.00 | 0.06 |
| ADAMTS20 | chr12:43833754  | G | A | synonymous<br>SNV | 2 | O | O | X | X | 89  | 0 | 95  | 6  | 0.00 | 0.06 |
| LRTOMT   | chr11:71806443  | C | T | synonymous<br>SNV | 2 | O | O | X | X | 123 | 0 | 123 | 6  | 0.00 | 0.05 |
| ANK2     | chr4:114279242  | C | T | synonymous<br>SNV | 2 | O | O | X | X | 125 | 0 | 109 | 6  | 0.00 | 0.05 |
| NDUFS6   | chr5:1814491    | G | A | synonymous<br>SNV | 2 | O | O | X | X | 193 | 0 | 187 | 10 | 0.00 | 0.05 |

**Table S2. Gene Ontology enrichment analysis for mutated genes.**

(A) GO Biological Process

| Term       |                                                        | Count | Genes                                                                                                                                                                                                                                                                     | P-value |
|------------|--------------------------------------------------------|-------|---------------------------------------------------------------------------------------------------------------------------------------------------------------------------------------------------------------------------------------------------------------------------|---------|
| GO:0065007 | biological regulation                                  | 38    | SSH2, KLHL6, ARHGAP22, SCYL1, ZNF41, LILRB1, LIPG, ZNF570, NME9, APOB, LAMA1, CHD1, GAS8, LINGO1, RPS6KA2, ADORA1, DHX33, RABGAP1, CLK4, CCL21, URI1, SLC22A5, CARD6, DLEC1, ZXDC, RREB1, FMN1, TEP1, FLNA, ZNF850, NIN, MLLT4, NSD1, ITGAE, C8orf34, TAAR8, G3BP1, SKOR2 | 0.0028  |
| GO:0015837 | amine transport                                        | 3     | LILRB1, ADORA1, SLC22A5                                                                                                                                                                                                                                                   | 0.0033  |
| GO:0008064 | regulation of actin polymerization or depolymerization | 3     | CCL21, SSH2, FMN1                                                                                                                                                                                                                                                         | 0.0036  |
| GO:0050794 | regulation of cellular process                         | 35    | SSH2, KLHL6, ARHGAP22, SCYL1, ZNF41, LILRB1, LIPG, ZNF570, NME9, APOB, LAMA1, CHD1, GAS8, LINGO1, RPS6KA2, ADORA1, DHX33, RABGAP1, CLK4, CCL21, URI1, CARD6, DLEC1, ZXDC, RREB1, FMN1, FLNA, ZNF850, MLLT4, NSD1, ITGAE, C8orf34, TAAR8, SKOR2, G3BP1                     | 0.0037  |
| GO:0030832 | regulation of actin filament length                    | 3     | CCL21, SSH2, FMN1                                                                                                                                                                                                                                                         | 0.0038  |
| GO:0050789 | regulation of biological process                       | 36    | SSH2, KLHL6, ARHGAP22, SCYL1, ZNF41, LILRB1, LIPG, ZNF570, NME9, APOB, LAMA1, CHD1, GAS8, LINGO1, RPS6KA2, ADORA1, DHX33, RABGAP1, CLK4, CCL21, URI1, SLC22A5, CARD6, DLEC1, ZXDC, RREB1, FMN1, FLNA, ZNF850, MLLT4, NSD1, ITGAE, C8orf34, TAAR8, G3BP1, SKOR2            | 0.0048  |
| GO:0007015 | <b>actin filament organization</b>                     | 4     | CCL21, SSH2, FLNA, FMN1                                                                                                                                                                                                                                                   | 0.0053  |
| GO:0008154 | actin polymerization or depolymerization               | 3     | CCL21, SSH2, FMN1                                                                                                                                                                                                                                                         | 0.0072  |
| GO:0006898 | receptor-mediated endocytosis                          | 3     | CCL21, LILRB1, APOB                                                                                                                                                                                                                                                       | 0.0096  |
| GO:0097285 | cell-type specific apoptotic process                   | 4     | CCL21, LILRB1, RPS6KA2, ADORA1                                                                                                                                                                                                                                            | 0.0108  |
| GO:0090066 | regulation of anatomical structure size                | 4     | CCL21, SSH2, ADORA1, FMN1                                                                                                                                                                                                                                                 | 0.0134  |
| GO:0034329 | cell junction assembly                                 | 3     | MLLT4, FRMPD2, FLNA                                                                                                                                                                                                                                                       | 0.0189  |
| GO:0032956 | regulation of actin cytoskeleton organization          | 3     | CCL21, SSH2, FMN1                                                                                                                                                                                                                                                         | 0.0195  |



|            |                                                                |    |                                                                                                                                                      |        |
|------------|----------------------------------------------------------------|----|------------------------------------------------------------------------------------------------------------------------------------------------------|--------|
| GO:0032535 | regulation of cellular component size                          | 3  | CCL21, SSH2, FMN1                                                                                                                                    | 0.0198 |
| GO:0030001 | metal ion transport                                            | 5  | CCL21, LILRB1, ADORA1, SLC10A7, SLC22A5                                                                                                              | 0.0241 |
| GO:0032970 | regulation of actin filament-based process                     | 3  | CCL21, SSH2, FMN1                                                                                                                                    | 0.0256 |
| GO:0080090 | regulation of primary metabolic process                        | 21 | RREB1, ZXDC, ARHGAP22, SCYL1, ZNF41, LILRB1, LIPG, FLNA, ZNF570, APOB, ZNF850, CHD1, NSD1, RPS6KA2, ADORA1, DHX33, RABGAP1, URI1, CCL21, CLK4, SKOR2 | 0.0267 |
| GO:0034330 | cell junction organization                                     | 3  | MLLT4, FRMPD2, FLNA                                                                                                                                  | 0.0270 |
| GO:0051235 | maintenance of location                                        | 3  | CCL21, FLNA, NIN                                                                                                                                     | 0.0299 |
| GO:0030031 | cell projection assembly                                       | 3  | CCL21, SSH2, FLNA                                                                                                                                    | 0.0299 |
| GO:0008285 | negative regulation of cell proliferation                      | 5  | LILRB1, DLEC1, RPS6KA2, ADORA1, GAS8                                                                                                                 | 0.0301 |
| GO:0006897 | endocytosis                                                    | 4  | CCL21, LILRB1, ADORA1, APOB                                                                                                                          | 0.0314 |
| GO:0010468 | regulation of gene expression                                  | 17 | NSD1, RPS6KA2, RREB1, ZXDC, DHX33, ARHGAP22, SCYL1, CLK4, CCL21, ZNF41, LILRB1, URI1, FLNA, ZNF570, SKOR2, ZNF850, CHD1                              | 0.0343 |
| GO:0019216 | regulation of lipid metabolic process                          | 3  | CCL21, ADORA1, APOB                                                                                                                                  | 0.0358 |
| GO:0019219 | regulation of nucleobase-containing compound metabolic process | 17 | NSD1, RREB1, ZXDC, DHX33, RABGAP1, ARHGAP22, SCYL1, CLK4, CCL21, URI1, ZNF41, LILRB1, FLNA, ZNF570, SKOR2, ZNF850, CHD1                              | 0.0399 |
| GO:0030036 | actin cytoskeleton organization                                | 4  | CCL21, SSH2, FLNA, FMN1                                                                                                                              | 0.0459 |
| GO:0002764 | immune response-regulating signaling pathway                   | 3  | LILRB1, RPS6KA2, KLHL6                                                                                                                               | 0.0479 |
| GO:0051252 | regulation of RNA metabolic process                            | 15 | NSD1, RREB1, ZXDC, DHX33, ARHGAP22, SCYL1, CLK4, ZNF41, LILRB1, URI1, FLNA, ZNF570, SKOR2, ZNF850, CHD1                                              | 0.0487 |
| GO:0050900 | leukocyte migration                                            | 3  | CCL21, ADORA1, APOB                                                                                                                                  | 0.0493 |
| GO:0051171 | regulation of nitrogen compound metabolic process              | 17 | NSD1, RREB1, ZXDC, DHX33, RABGAP1, ARHGAP22, SCYL1, CLK4, CCL21, URI1, ZNF41, LILRB1, FLNA, ZNF570, SKOR2, ZNF850, CHD1                              | 0.0495 |
| GO:0016311 | dephosphorylation                                              | 3  | URI1, SSH2, ADORA1                                                                                                                                   | 0.0498 |

## (B) GO Molecular Function

|            | Term                                                | Count | Genes                                                                                                                                                                                       | P-value |
|------------|-----------------------------------------------------|-------|---------------------------------------------------------------------------------------------------------------------------------------------------------------------------------------------|---------|
| GO:0097367 | carbohydrate derivative binding                     | 4     | LIPG, CHIT1, APOB, SUSD5                                                                                                                                                                    | 0.0033  |
| GO:0070035 | purine NTP-dependent helicase activity              | 3     | G3BP1, DHX33, CHD1                                                                                                                                                                          | 0.0051  |
| GO:0008026 | ATP-dependent helicase activity                     | 3     | G3BP1, DHX33, CHD1                                                                                                                                                                          | 0.0051  |
| GO:0043168 | anion binding                                       | 15    | NLRP13, RPS6KA2, DHX33, SCYL1, TEP1, CLK4, LIPG, FRMPD2, NME9, G3BP1, GOT1L1, APOB, CHD1, NIN, SLC22A5                                                                                      | 0.0070  |
| GO:0015293 | symporter activity                                  | 3     | SLC16A9, SLC10A7, SLC22A5                                                                                                                                                                   | 0.0084  |
| GO:0043167 | ion binding                                         | 27    | NLRP13, RREB1, ZXDC, SCYL1, TRMT1, TEP1, ZNF41, LIPG, FRMPD2, ZNF570, PDZRN4, NME9, ARSF, GOT1L1, APOB, ZNF850, CHD1, NIN, NSD1, RPS6KA2, DHX33, ZFAND4, FREM2, CLK4, CHIT1, G3BP1, SLC22A5 | 0.0119  |
| GO:0001883 | purine nucleoside binding                           | 12    | NLRP13, RPS6KA2, ADORA1, DHX33, SCYL1, TEP1, CLK4, NME9, G3BP1, CHD1, NIN, SLC22A5                                                                                                          | 0.0121  |
| GO:0004386 | helicase activity                                   | 3     | G3BP1, DHX33, CHD1                                                                                                                                                                          | 0.0125  |
| GO:0001882 | nucleoside binding                                  | 12    | NLRP13, RPS6KA2, ADORA1, DHX33, SCYL1, TEP1, CLK4, NME9, G3BP1, CHD1, NIN, SLC22A5                                                                                                          | 0.0127  |
| GO:0005524 | ATP binding                                         | 10    | NLRP13, RPS6KA2, DHX33, SCYL1, TEP1, CLK4, NME9, G3BP1, CHD1, SLC22A5                                                                                                                       | 0.0183  |
| GO:0005539 | glycosaminoglycan binding                           | 3     | LIPG, APOB, SUSD5                                                                                                                                                                           | 0.0192  |
| GO:0032559 | adenyl ribonucleotide binding                       | 10    | NLRP13, RPS6KA2, DHX33, SCYL1, TEP1, CLK4, NME9, G3BP1, CHD1, SLC22A5                                                                                                                       | 0.0208  |
| GO:0030554 | adenyl nucleotide binding                           | 10    | NLRP13, RPS6KA2, DHX33, SCYL1, TEP1, CLK4, NME9, G3BP1, CHD1, SLC22A5                                                                                                                       | 0.0212  |
| GO:0003714 | transcription corepressor activity                  | 3     | URH1, NSD1, SKOR2                                                                                                                                                                           | 0.0229  |
| GO:0015291 | secondary active transmembrane transporter activity | 3     | SLC16A9, SLC10A7, SLC22A5                                                                                                                                                                   | 0.0245  |
| GO:0035639 | purine ribonucleoside triphosphate binding          | 11    | NLRP13, RPS6KA2, DHX33, SCYL1, TEP1, CLK4, NME9, G3BP1, CHD1, NIN, SLC22A5                                                                                                                  | 0.0284  |
| GO:0032550 | purine ribonucleoside binding                       | 11    | NLRP13, RPS6KA2, DHX33, SCYL1, TEP1, CLK4, NME9, G3BP1, CHD1, NIN, SLC22A5                                                                                                                  | 0.0293  |

|            |                               |    |                                                                                                   |        |
|------------|-------------------------------|----|---------------------------------------------------------------------------------------------------|--------|
| GO:0032549 | ribonucleoside binding        | 11 | NLRP13, RPS6KA2, DHX33, SCYL1, TEP1, CLK4, NME9, G3BP1, CHD1, NIN, SLC22A5                        | 0.0298 |
| GO:0032555 | purine ribonucleotide binding | 11 | NLRP13, RPS6KA2, DHX33, SCYL1, TEP1, CLK4, NME9, G3BP1, CHD1, NIN, SLC22A5                        | 0.0322 |
| GO:0017076 | purine nucleotide binding     | 11 | NLRP13, RPS6KA2, DHX33, SCYL1, TEP1, CLK4, NME9, G3BP1, CHD1, NIN, SLC22A5                        | 0.0330 |
| GO:0032553 | ribonucleotide binding        | 11 | NLRP13, RPS6KA2, DHX33, SCYL1, TEP1, CLK4, NME9, G3BP1, CHD1, NIN, SLC22A5                        | 0.0339 |
| GO:0036094 | small molecule binding        | 14 | NLRP13, RPS6KA2, ADORA1, DHX33, SCYL1, TEP1, CLK4, NME9, G3BP1, SKOR2, GOT1L1, CHD1, NIN, SLC22A5 | 0.0348 |
| GO:0005102 | receptor binding              | 8  | CCL21, LILRB1, NSD1, FLNA, ADORA1, APOB, LAMA1, LINGO1                                            | 0.0397 |

### (C) GO Cellular Component

| Term       |                             | Count | Genes                                                                      | P-value |
|------------|-----------------------------|-------|----------------------------------------------------------------------------|---------|
| GO:0030662 | coated vesicle membrane     | 3     | APOB, C3orf58, SCYL1                                                       | 0.0108  |
| GO:0016323 | basolateral plasma membrane | 3     | FRMPD2, ADORA1, SLC22A5                                                    | 0.0144  |
| GO:0005856 | cytoskeleton                | 11    | SSH2, RPS6KA2, ADORA1, FMN1, RABGAP1, SCYL1, FRMPD2, FLNA, NME9, NIN, GAS8 | 0.0172  |
| GO:0030135 | coated vesicle              | 3     | APOB, C3orf58, SCYL1                                                       | 0.0425  |
| GO:0005576 | extracellular region        | 11    | IGSF21, FREM2, CCL21, LIPG, FLNA, CHIT1, ARSF, APOOL, LAMA1, APOB, C3orf58 | 0.0461  |

**Table S3. List of differentially expressed genes. LogFC and logCPM (counts\_per\_million)**

indicate the fold change and overall expression in log scale.

| Genes         | Expression |           | edgeR Results |        |          |
|---------------|------------|-----------|---------------|--------|----------|
|               | U87-WT     | U87-DR    | logFC         | logCPM | p-value  |
| AKR1B1        | 9001.86    | 105056.35 | 3.54          | 12.40  | 3.53E-03 |
| AKR1C1        | 388.21     | 8119.04   | 4.39          | 8.66   | 2.38E-03 |
| AKR1C2        | 90.85      | 650.82    | 2.84          | 5.14   | 6.70E-03 |
| AKR1C3        | 199.52     | 1146.81   | 2.52          | 6.00   | 7.05E-03 |
| ALPK2         | 173.84     | 2289.61   | 3.72          | 6.87   | 3.18E-03 |
| ANXA8L2       | 0.00       | 66.75     | 9.06          | 1.74   | 9.69E-03 |
| ATF3          | 64.18      | 619.43    | 3.27          | 5.03   | 5.25E-03 |
| ATP1B1        | 373.40     | 1732.90   | 2.21          | 6.64   | 9.64E-03 |
| ATP5J2-PTCD1  | 89.96      | 0.03      | -9.49         | 2.16   | 6.97E-03 |
| BDKRB1        | 275.59     | 1385.70   | 2.33          | 6.30   | 8.32E-03 |
| C11orf96      | 7.87       | 282.35    | 5.14          | 3.80   | 3.89E-03 |
| C1orf151-NBL1 | 175.91     | 0.03      | -10.46        | 3.10   | 3.55E-03 |
| C3            | 235.09     | 4842.45   | 4.36          | 7.91   | 2.39E-03 |
| CA9           | 3289.81    | 523.36    | -2.65         | 7.50   | 6.03E-03 |
| CCL2          | 48.37      | 916.01    | 4.24          | 5.52   | 2.64E-03 |
| CHAC1         | 19.72      | 246.93    | 3.64          | 3.68   | 8.12E-03 |
| COL5A3        | 86.90      | 549.59    | 2.66          | 4.92   | 8.70E-03 |
| CRYAB         | 6.88       | 157.85    | 4.49          | 3.00   | 8.06E-03 |
| CSF3          | 215.33     | 3395.98   | 3.98          | 7.42   | 2.78E-03 |
| CXCL1         | 27.63      | 366.37    | 3.72          | 4.24   | 5.82E-03 |
| CXCL2         | 60.23      | 492.91    | 3.03          | 4.72   | 6.81E-03 |
| CXCL3         | 35.53      | 325.89    | 3.19          | 4.11   | 9.01E-03 |
| ETS2          | 329.93     | 1777.43   | 2.43          | 6.65   | 7.53E-03 |
| FAM156B       | 173.93     | 0.03      | -10.44        | 3.08   | 3.59E-03 |
| FBXO2         | 7.87       | 238.83    | 4.90          | 3.57   | 4.85E-03 |
| FGF2          | 912.80     | 4372.79   | 2.26          | 7.97   | 8.86E-03 |
| FILIP1L       | 256.82     | 1405.94   | 2.45          | 6.30   | 7.23E-03 |
| FLJ43663      | 163.96     | 1433.27   | 3.13          | 6.25   | 4.21E-03 |
| FLJ46300      | 0.96       | 204.41    | 7.52          | 3.31   | 3.44E-03 |
| GDF15         | 277.57     | 2606.44   | 3.23          | 7.10   | 4.13E-03 |
| GLS           | 1985.68    | 9169.76   | 2.21          | 9.05   | 9.95E-03 |

|             |         |         |       |      |          |
|-------------|---------|---------|-------|------|----------|
| HIST2H2AA3  | 66.15   | 494.93  | 2.90  | 4.74 | 7.46E-03 |
| HIST2H2BE   | 123.45  | 784.43  | 2.67  | 5.43 | 6.82E-03 |
| HSPA6       | 18.74   | 3086.22 | 7.35  | 7.20 | 1.37E-03 |
| IER3        | 817.96  | 5569.24 | 2.77  | 8.24 | 5.37E-03 |
| IGFBP5      | 37.50   | 374.47  | 3.31  | 4.30 | 7.39E-03 |
| IL11        | 150.13  | 970.68  | 2.69  | 5.74 | 6.33E-03 |
| IL1B        | 367.47  | 1720.75 | 2.23  | 6.63 | 9.50E-03 |
| IL6         | 130.37  | 2247.09 | 4.11  | 6.82 | 2.65E-03 |
| IL8         | 205.45  | 4431.49 | 4.43  | 7.78 | 2.32E-03 |
| INHBE       | 25.65   | 284.38  | 3.46  | 3.89 | 7.98E-03 |
| INO80B-WBP1 | 94.90   | 0.03    | -9.57 | 2.23 | 6.78E-03 |
| KIAA1199    | 1322.78 | 9460.26 | 2.84  | 9.00 | 5.17E-03 |
| KLF5        | 230.15  | 1096.20 | 2.25  | 5.98 | 9.38E-03 |
| LOC645638   | 49.36   | 462.54  | 3.22  | 4.61 | 6.18E-03 |
| LOXL4       | 30.59   | 311.71  | 3.34  | 4.04 | 8.35E-03 |
| MMP3        | 181.74  | 1546.64 | 3.09  | 6.36 | 4.26E-03 |
| MRGPRF      | 42.44   | 382.57  | 3.17  | 4.35 | 7.44E-03 |
| MSC         | 168.90  | 875.54  | 2.37  | 5.64 | 8.96E-03 |
| MSMO1       | 484.05  | 2318.98 | 2.26  | 7.06 | 9.40E-03 |
| MYH15       | 236.08  | 1291.56 | 2.45  | 6.18 | 7.48E-03 |
| MYZAP       | 75.05   | 523.27  | 2.80  | 4.84 | 7.90E-03 |
| NADKD1      | 402.05  | 2592.27 | 2.69  | 7.15 | 5.98E-03 |
| NBL1        | 0.00    | 201.37  | 10.66 | 3.28 | 3.25E-03 |
| NUPR1       | 84.92   | 751.02  | 3.14  | 5.32 | 5.07E-03 |
| NYAP1       | 2.93    | 119.39  | 5.27  | 2.58 | 8.37E-03 |
| PI3         | 12.81   | 866.40  | 6.06  | 5.39 | 1.81E-03 |
| PLAT        | 234.10  | 1379.62 | 2.56  | 6.26 | 6.57E-03 |
| PRRG4       | 69.12   | 436.22  | 2.66  | 4.59 | 9.95E-03 |
| PRSS35      | 4.91    | 475.68  | 6.55  | 4.52 | 2.08E-03 |
| PTGS2       | 121.48  | 1360.38 | 3.48  | 6.14 | 3.54E-03 |
| PTX3        | 879.21  | 4226.02 | 2.26  | 7.92 | 9.12E-03 |
| RANBP3L     | 42.44   | 1808.79 | 5.41  | 6.46 | 1.71E-03 |
| RCAN1       | 437.61  | 5790.91 | 3.73  | 8.21 | 3.08E-03 |
| RGS16       | 0.00    | 140.64  | 10.14 | 2.77 | 4.56E-03 |
| RN7SK       | 7.87    | 154.82  | 4.27  | 2.98 | 8.96E-03 |
| RND3        | 1074.82 | 5038.84 | 2.23  | 8.18 | 9.31E-03 |

|            |         |          |        |      |          |
|------------|---------|----------|--------|------|----------|
| RPS17      | 667.90  | 0.03     | -12.38 | 4.99 | 1.64E-03 |
| RSPO3      | 50.35   | 601.21   | 3.57   | 4.96 | 4.40E-03 |
| S100A9     | 7.87    | 422.04   | 5.72   | 4.36 | 2.61E-03 |
| SAT1       | 327.95  | 2048.71  | 2.64   | 6.82 | 6.18E-03 |
| SLC3A2     | 863.40  | 4307.00  | 2.32   | 7.94 | 8.51E-03 |
| SLC5A3     | 1947.15 | 11954.40 | 2.62   | 9.36 | 6.34E-03 |
| SLC6A12    | 10.83   | 1451.47  | 7.05   | 6.12 | 1.45E-03 |
| SLC6A9     | 27.63   | 489.86   | 4.14   | 4.63 | 3.89E-03 |
| SLPI       | 2.93    | 242.87   | 6.30   | 3.56 | 3.48E-03 |
| SOD2       | 963.18  | 5009.49  | 2.38   | 8.15 | 7.75E-03 |
| SULF2      | 23.67   | 347.14   | 3.87   | 4.15 | 5.65E-03 |
| TNFSF15    | 7.87    | 341.06   | 5.41   | 4.06 | 3.19E-03 |
| TNFSF9     | 159.02  | 1135.67  | 2.84   | 5.94 | 5.20E-03 |
| TRIB3      | 84.92   | 610.33   | 2.84   | 5.05 | 6.93E-03 |
| WISP1      | 65.17   | 587.04   | 3.17   | 4.96 | 5.70E-03 |
| ZNF295-AS1 | 0.00    | 66.75    | 9.06   | 1.74 | 9.69E-03 |

**Table S4. KEGG and Gene Ontology enrichment analysis for differentially expressed genes.**

(A) KEGG pathway

|          | <b>Term</b>                            | <b>Count</b> | <b>Genes</b>                                                                  | <b>FDR</b> |
|----------|----------------------------------------|--------------|-------------------------------------------------------------------------------|------------|
| hsa04060 | Cytokine-cytokine receptor interaction | 12           | CSF3, IL11, CCL2, IL6, CXCL3, IL8, INHBE, CXCL1, TNFSF15, CXCL2, IL1B, TNFSF9 | 2.46E-08   |
| hsa04621 | NOD-like receptor signaling pathway    | 6            | CXCL1, CXCL2, IL1B, CCL2, IL6, IL8                                            | 1.33E-06   |
| hsa05323 | Rheumatoid arthritis                   | 7            | CXCL1, IL11, MMP3, IL1B, CCL2, IL6, IL8                                       | 1.33E-06   |
| hsa05144 | Malaria                                | 5            | CSF3, IL1B, CCL2, IL6, IL8                                                    | 1.55E-05   |

(B) GO Biological Process

|            | <b>Term</b>                                                 | <b>Count</b> | <b>Genes</b>                                                                                                                                   | <b>FDR</b> |
|------------|-------------------------------------------------------------|--------------|------------------------------------------------------------------------------------------------------------------------------------------------|------------|
| GO:0010574 | regulation of vascular endothelial growth factor production | 6            | C3, PTGS2, IL1B, CCL2, IL6, SULF2                                                                                                              | 3.31E-07   |
| GO:0010573 | vascular endothelial growth factor production               | 6            | C3, PTGS2, IL1B, CCL2, IL6, SULF2                                                                                                              | 3.31E-07   |
| GO:0009611 | response to wounding                                        | 21           | C3, IL11, SLC3A2, FGF2, CCL2, CXCL3, SOD2, CXCL2, ATP1B1, PLAT, IL1B, IER3, PTGS2, MMP3, NUPR1, IL6, PTX3, IL8, CXCL1, BDKRB1, S100A9          | 2.64E-06   |
| GO:0030647 | aminoglycoside antibiotic metabolic process                 | 4            | AKR1B1, AKR1C1, AKR1C2, AKR1C3                                                                                                                 | 3.89E-06   |
| GO:0044597 | daunorubicin metabolic process                              | 4            | AKR1B1, AKR1C1, AKR1C2, AKR1C3                                                                                                                 | 3.89E-06   |
| GO:0006954 | inflammatory response                                       | 14           | C3, PTGS2, NUPR1, CCL2, IL6, CXCL3, PTX3, IL8, CXCL1, CXCL2, BDKRB1, S100A9, IL1B, IER3                                                        | 3.89E-06   |
| GO:0044598 | doxorubicin metabolic process                               | 4            | AKR1B1, AKR1C1, AKR1C2, AKR1C3                                                                                                                 | 3.89E-06   |
| GO:0002237 | response to molecule of bacterial origin                    | 10           | PTGS2, MMP3, CCL2, IL6, IL8, SOD2, CXCL2, BDKRB1, S100A9, IL1B                                                                                 | 7.78E-06   |
| GO:0010033 | response to organic substance                               | 25           | FGF2, CCL2, CRYAB, SOD2, AKR1C1, RCAN1, ATF3, CXCL2, CHAC1, AKR1C3, PLAT, IL1B, HSPA6, TRIB3, SLC6A12, CSF3, PTGS2, AKR1C2, MMP3, IL6, IGFBP5, | 1.27E-05   |

|            |                                                                   |    |                                                                                                                                                                                                                  |          |
|------------|-------------------------------------------------------------------|----|------------------------------------------------------------------------------------------------------------------------------------------------------------------------------------------------------------------|----------|
|            |                                                                   |    | IL8, BDKRB1, S100A9, SULF2                                                                                                                                                                                       |          |
| GO:0050900 | leukocyte migration                                               | 10 | NBL1, SLC3A2, CCL2, IL6, CXCL3, IL8, ATP1B1, BDKRB1, IL1B, S100A9                                                                                                                                                | 1.54E-05 |
| GO:0008207 | C21-steroid hormone metabolic process                             | 5  | AKR1B1, AKR1C1, AKR1C2, AKR1C3, FGF2                                                                                                                                                                             | 1.66E-05 |
| GO:0033993 | response to lipid                                                 | 14 | PTGS2, MMP3, AKR1C2, CCL2, CRYAB, IL6, IL8, SOD2, RCAN1, BDKRB1, AKR1C3, S100A9, PLAT, IL1B                                                                                                                      | 2.08E-05 |
| GO:0045429 | positive regulation of nitric oxide biosynthetic process          | 5  | PTGS2, IL1B, IL6, PTX3, SOD2                                                                                                                                                                                     | 2.35E-05 |
| GO:0071395 | cellular response to jasmonic acid stimulus                       | 3  | AKR1C1, AKR1C2, AKR1C3                                                                                                                                                                                           | 2.44E-05 |
| GO:0009753 | response to jasmonic acid stimulus                                | 3  | AKR1C1, AKR1C2, AKR1C3                                                                                                                                                                                           | 2.44E-05 |
| GO:0009617 | response to bacterium                                             | 11 | PTGS2, MMP3, CCL2, IL6, IL8, SOD2, HIST2H2BE, CXCL2, BDKRB1, S100A9, IL1B                                                                                                                                        | 2.46E-05 |
| GO:0032496 | response to lipopolysaccharide                                    | 9  | PTGS2, MMP3, CCL2, IL6, IL8, SOD2, BDKRB1, IL1B, S100A9                                                                                                                                                          | 2.62E-05 |
| GO:0006950 | response to stress                                                | 31 | C3, IL11, SLC3A2, FGF2, CCL2, CRYAB, CXCL3, SOD2, HIST2H2BE, ATF3, CXCL2, ATP1B1, CHAC1, AKR1C3, PLAT, IL1B, HSPA6, IER3, TRIB3, SLC6A12, PTGS2, MMP3, NUPR1, IL6, PTX3, IL8, CXCL1, AKR1B1, BDKRB1, S100A9, CA9 | 3.19E-05 |
| GO:0042221 | response to chemical stimulus                                     | 30 | NBL1, FGF2, CCL2, CRYAB, CXCL3, SOD2, AKR1C1, RCAN1, ATF3, CXCL2, CHAC1, AKR1C3, PLAT, IL1B, HSPA6, TRIB3, SLC6A12, CSF3, PTGS2, AKR1C2, MMP3, NUPR1, IL6, IGFBP5, IL8, CXCL1, BDKRB1, S100A9, CA9, SULF2        | 3.19E-05 |
| GO:0032101 | regulation of response to external stimulus                       | 11 | C3, PTGS2, NBL1, FGF2, CCL2, IL6, IL8, PLAT, IL1B, S100A9, IER3                                                                                                                                                  | 4.11E-05 |
| GO:0016137 | glycoside metabolic process                                       | 4  | AKR1B1, AKR1C1, AKR1C2, AKR1C3                                                                                                                                                                                   | 4.11E-05 |
| GO:0030595 | <b>leukocyte chemotaxis</b>                                       | 7  | NBL1, S100A9, IL1B, CCL2, IL6, CXCL3, IL8                                                                                                                                                                        | 4.11E-05 |
| GO:0010575 | positive regulation vascular endothelial growth factor production | 4  | C3, PTGS2, IL1B, SULF2                                                                                                                                                                                           | 6.04E-05 |
| GO:0045428 | <b>regulation of nitric oxide biosynthetic process</b>            | 5  | PTGS2, IL1B, IL6, PTX3, SOD2                                                                                                                                                                                     | 6.04E-05 |
| GO:0001666 | <b>response to hypoxia</b>                                        | 9  | PTGS2, MMP3, CCL2, CRYAB, SOD2, ATP1B1, PLAT, IL1B, CA9                                                                                                                                                          | 6.35E-05 |
| GO:0051707 | response to other organism                                        | 13 | PTGS2, MMP3, CCL2, IL6, PTX3, IL8, SOD2, HIST2H2BE, CXCL2, BDKRB1, S100A9, IL1B, IER3                                                                                                                            | 6.35E-05 |



|            |                                                      |    |                                                                                                                                                                                                                                                                                                                                          |          |
|------------|------------------------------------------------------|----|------------------------------------------------------------------------------------------------------------------------------------------------------------------------------------------------------------------------------------------------------------------------------------------------------------------------------------------|----------|
| GO:0036293 | response to decreased oxygen levels                  | 9  | PTGS2, MMP3, CCL2, CRYAB, SOD2, ATP1B1, PLAT, IL1B, CA9                                                                                                                                                                                                                                                                                  | 6.77E-05 |
| GO:0009607 | response to biotic stimulus                          | 13 | PTGS2, MMP3, CCL2, IL6, PTX3, IL8, SOD2, HIST2H2BE, CXCL2, BDKRB1, S100A9, IL1B, IER3                                                                                                                                                                                                                                                    | 9.46E-05 |
| GO:0030593 | neutrophil chemotaxis                                | 5  | S100A9, IL1B, CCL2, CXCL3, IL8                                                                                                                                                                                                                                                                                                           | 9.46E-05 |
| GO:0002675 | positive regulation of acute inflammatory response   | 4  | C3, PTGS2, IL1B, IL6                                                                                                                                                                                                                                                                                                                     | 9.46E-05 |
| GO:0042127 | <b>regulation of cell proliferation</b>              | 18 | IL11, FGF2, CCL2, SAT1, SOD2, ATF3, AKR1C3, IL1B, TNFSF9, PTGS2, CSF3, AKR1C2, NUPR1, IL6, IGFBP5, IL8, CXCL1, KLF5                                                                                                                                                                                                                      | 9.46E-05 |
| GO:0070482 | response to oxygen levels                            | 9  | PTGS2, MMP3, CCL2, CRYAB, SOD2, ATP1B1, PLAT, IL1B, CA9                                                                                                                                                                                                                                                                                  | 9.46E-05 |
| GO:0050896 | response to stimulus                                 | 48 | RGS16, IL11, NBL1, CCL2, CRYAB, NYAP1, CXCL3, SOD2, HIST2H2BE, AKR1C1, RCAN1, GDF15, CXCL2, CHAC1, IL1B, PLAT, TNFSF9, IER3, CSF3, AKR1C2, PTX3, AKR1B1, BDKRB1, S100A9, SULF2, C3, SLC3A2, FGF2, WISP1, MYZAP, ATF3, ATP1B1, AKR1C3, RSPO3, HSPA6, GLS, TRIB3, SLC6A12, PTGS2, MMP3, RND3, NUPR1, IL6, IGFBP5, IL8, CXCL1, TNFSF15, CA9 | 9.97E-05 |
| GO:0060326 | cell chemotaxis                                      | 7  | NBL1, S100A9, IL1B, CCL2, IL6, CXCL3, IL8                                                                                                                                                                                                                                                                                                | 1.00E-04 |
| GO:0032103 | positive regulation of response to external stimulus | 7  | C3, PTGS2, S100A9, IL1B, CCL2, IL6, IL8                                                                                                                                                                                                                                                                                                  | 1.00E-04 |
| GO:0006809 | nitric oxide biosynthetic process                    | 5  | PTGS2, IL1B, IL6, PTX3, SOD2                                                                                                                                                                                                                                                                                                             | 1.00E-04 |
| GO:0016477 | cell migration                                       | 15 | PTGS2, NBL1, SLC3A2, MMP3, FGF2, CCL2, IL6, CXCL3, IGFBP5, IL8, ATP1B1, BDKRB1, S100A9, PLAT, IL1B                                                                                                                                                                                                                                       | 1.00E-04 |

### (C) GO Molecular Function

| Term       | Count                                   | Genes | FDR                                                                                 |
|------------|-----------------------------------------|-------|-------------------------------------------------------------------------------------|
| GO:0005125 | <b>cytokine activity</b>                | 13    | CSF3, IL11, FGF2, CCL2, IL6, CXCL3, IL8, CXCL1, GDF15, TNFSF15, CXCL2, IL1B, TNFSF9 |
| GO:0005126 | cytokine receptor binding               | 11    | CSF3, IL11, CCL2, IL6, CXCL3, IL8, CXCL1, TNFSF15, CXCL2, IL1B, TNFSF9              |
| GO:0004032 | alditol:NADP+ 1-oxidoreductase activity | 4     | AKR1B1, AKR1C1, AKR1C2, AKR1C3                                                      |

|            |                                                          |    |                                                                                                                            |          |
|------------|----------------------------------------------------------|----|----------------------------------------------------------------------------------------------------------------------------|----------|
| GO:0047086 | ketosteroid monooxygenase activity                       | 3  | AKR1C1, AKR1C2, AKR1C3                                                                                                     | 2.74E-06 |
| GO:0018636 | phenanthrene 9,10-monooxygenase activity                 | 3  | AKR1C1, AKR1C2, AKR1C3                                                                                                     | 2.74E-06 |
| GO:0008106 | alcohol dehydrogenase (NADP+) activity                   | 4  | AKR1B1, AKR1C1, AKR1C2, AKR1C3                                                                                             | 4.77E-06 |
| GO:0047115 | trans-1,2-dihydrobenzene-1,2-diol dehydrogenase activity | 3  | AKR1C1, AKR1C2, AKR1C3                                                                                                     | 6.83E-06 |
| GO:0047023 | androsterone dehydrogenase activity                      | 3  | AKR1C1, AKR1C2, AKR1C3                                                                                                     | 6.83E-06 |
| GO:0008083 | growth factor activity                                   | 8  | CXCL1, CSF3, GDF15, IL11, FGF2, IL1B, IL6, INHBE                                                                           | 1.09E-05 |
| GO:0005102 | receptor binding                                         | 19 | C3, IL11, FGF2, CCL2, CXCL3, GDF15, CXCL2, CHAC1, IL1B, TNFSF9, RSPO3, CSF3, ETS2, IL6, IL8, INHBE, CXCL1, TNFSF15, S100A9 | 1.50E-05 |
| GO:0004033 | aldo-keto reductase (NADP) activity                      | 4  | AKR1B1, AKR1C1, AKR1C2, AKR1C3                                                                                             | 1.57E-05 |
| GO:0008009 | chemokine activity                                       | 5  | CXCL1, CXCL2, CCL2, CXCL3, IL8                                                                                             | 2.81E-05 |
| GO:0042379 | chemokine receptor binding                               | 5  | CXCL1, CXCL2, CCL2, CXCL3, IL8                                                                                             | 6.25E-05 |

#### (D) GO Cellular Component

| Term       |                           | Count | Genes                                                                                                                                                                                                        | FDR      |
|------------|---------------------------|-------|--------------------------------------------------------------------------------------------------------------------------------------------------------------------------------------------------------------|----------|
| GO:0005615 | extracellular space       | 22    | C3, IL11, FGF2, CCL2, CXCL3, WISP1, GDF15, CXCL2, PLAT, IL1B, TNFSF9, CSF3, MMP3, IL6, IGFBP5, IL8, AKR1B1, CXCL1, TNFSF15, LOXL4, S100A9, SULF2                                                             | 1.93E-10 |
| GO:0044421 | extracellular region part | 24    | C3, IL11, FGF2, CCL2, CXCL3, WISP1, GDF15, CXCL2, PLAT, IL1B, TNFSF9, PI3, CSF3, MMP3, IL6, IGFBP5, IL8, AKR1B1, CXCL1, TNFSF15, LOXL4, COL5A3, S100A9, SULF2                                                | 2.37E-10 |
| GO:0005576 | extracellular region      | 31    | C3, IL11, NBL1, FGF2, CCL2, CXCL3, PRSS35, WISP1, SLPI, GDF15, CXCL2, PLAT, IL1B, RSPO3, TNFSF9, PI3, PRRG4, CSF3, MMP3, IL6, IGFBP5, PTX3, IL8, INHBE, AKR1B1, CXCL1, TNFSF15, LOXL4, COL5A3, S100A9, SULF2 | 9.57E-10 |
